# Supplementary material
Source: ML conference proceedings conference paper supplement (https://proceedings.mlr.press/v119/standley20a.html)
Supplement: Supplementary file [file standley20a-supp.pdf]

---

# Which Tasks Should Be Learned Together in Multi-task Learning? (Supplemental)

---

## Abstract

The following items are provided in the supplemental material:

1. A video showing various models' and baselines' predictions for each task in each frame of a YouTube video.
2. Validation and test set results for the single-task and multi-task networks that we trained.

## 1. Network Selection Algorithm

---

### Algorithm 1 Get Best Networks

---

**Input:**  $C_r$ , a running set of candidate networks, each with an associated cost  $c \in \mathbb{R}$  and a performance score for each task the network solves. Initially,  $C_r = C_0$

**Input:**  $S_r \subseteq C_0$ , a running solution, initially  $\emptyset$

**Input:**  $b_r \in \mathbb{R}$ , the remaining time budget, initially  $b$

```
1: function GETBESTNETWORKS( $C_r, S_r, b_r$ )
2:    $C_r \leftarrow \text{FILTER}(C_r, S_r, b_r)$ 
3:    $C_r \leftarrow \text{SORT}(C_r)$                                      ▷ Most promising networks first
4:    $Best \leftarrow S_r$ 
5:   for  $n \in C_r$  do
6:      $C_r \leftarrow C_r \setminus n$                                ▷ \ is set subtraction.
7:      $S_i \leftarrow S_r \cup \{n\}$ 
8:      $b_i \leftarrow b_r - c_n$ 
9:      $Child \leftarrow \text{GETBESTNETWORKS}(C_r, S_i, b_i)$ 
10:     $Best \leftarrow \text{BETTER}(Best, Child)$ 
11:  return  $Best$ 

12: function FILTER( $C_r, S_r, b_r$ )
13:  Remove networks from  $C_r$  with  $c_n > b_r$ .
14:  Remove networks from  $C_r$  that cannot improve  $S_r$ 's performance on any task.
15:  return  $C_r$ 

16: function BETTER( $S_1, S_2$ )
17:  if  $C(S_1) < C(S_2)$  then
18:    return  $S_1$ 
19:  else
20:    return  $S_2$ 
```

---

Algorithm 1 chooses the best subset of networks in our collection, subject to the inference time budget constraint. The algorithm recursively explores the space of solutions and prunes branches that cannot lead to optimal solutions. The recursion terminates when the budget is exhausted, at which point  $C_r$  becomes empty and the loop body does not execute.

The sorting step on line 3 requires a heuristic upon which to sort. We found that ranking models based on how much they improve the current solution,  $S$ , works well. It should be noted that this algorithm always produces an optimal solution, regardless of which sorting heuristic is used. However, better sorting heuristics reduce the running time because subsequent

## Which Tasks Should Be Learned Together in Multi-task Learning? (Supplemental)

---

055 iterations will more readily detect and prune portions of the search space that cannot contain an optimal solution. In our  
056 setup, we tried variants of problems with 5 tasks and 36 networks, and all of them took less than a second to solve.

057 The definition of the BETTER() function is application-specific. For our experiments, we prefer networks that have the  
058 lowest total loss across all five tasks. Other applications may have hard performance requirements for some of the tasks,  
059 and performance on one of these tasks cannot be sacrificed in order to achieve better performance on another task. Such  
060 application-specific constraints can be encoded in BETTER().  
061  
062  
063  
064  
065  
066  
067  
068  
069  
070  
071  
072  
073  
074  
075  
076  
077  
078  
079  
080  
081  
082  
083  
084  
085  
086  
087  
088  
089  
090  
091  
092  
093  
094  
095  
096  
097  
098  
099  
100  
101  
102  
103  
104  
105  
106  
107  
108  
109

## 2. Tabular Data

|     | Ours Optimal            | Single 20% pass 5.3.1          | Higher Order 5.3.2     |
|-----|-------------------------|--------------------------------|------------------------|
| 1   | SDNKE                   | SDNKE                          | SDNKE                  |
| 1.5 | DNKE, <b>S</b>          | SDNK, <b>E</b>                 | DNKE, <b>S</b>         |
| 2   | nKE, SDN                | SDke, NKE                      | DNK, <b>E, S</b>       |
| 2.5 | nKE, SDn, <b>N</b>      | SDke, nKE, <b>N</b>            | DNK, <b>E, Sn</b>      |
| 3   | nKE, SDn, N             | SDne, sdke, NKE                | DNK, E, Sn             |
| 3.5 | nKE, Snk, Dnk, <b>N</b> | SDne, sdke, nKE, <b>N</b>      | DnK, E, Sn, <b>N</b>   |
| 4   | nKE, Snk, Dnk, N        | SDne, sdke, nKE, <b>N</b>      | Sn, DK, E, N           |
| 4.5 | nKE, Snk, Dnk, N        | sDne, sdke, nKE, <b>N, Snk</b> | Sn, E, <b>K, Dn, N</b> |
| 5   | nKE, Snk, Dnk, N, K     | sDne, sdke, nKE, <b>N, Snk</b> | Sn, E, K, Dn, N        |

Table 1. **Setting 1: The task groups picked by each of our techniques for every budget choice between 1 and 5.** Networks are shown as a list of letters corresponding to each task the network contains. *S*: Semantic Segmentation, *D*: Depth Estimation, *N*: Surface Normal Prediction, *K*: Keypoint Detection, *E*: Edge Detection. Capital letters denote that a solution used that network’s prediction for that task. Half-sized networks are shown in red.

| Time Budget        | 1            | 1.5          | 2            | 2.5          | 3            | 3.5          | 4            | 4.5          | 5            |
|--------------------|--------------|--------------|--------------|--------------|--------------|--------------|--------------|--------------|--------------|
| Sener et al.       | 0.562        |              | 0.556        | 0.551        |              |              | 0.547        |              |              |
| GradNorm           | 0.515        |              |              |              |              |              | 0.500        |              |              |
| Pessimial Grouping | <b>0.503</b> | 0.503        | 0.503        | 0.503        | 0.503        | 0.502        | 0.499        | 0.496        | 0.495        |
| Traditional MTL    | <b>0.503</b> |              | 0.492        | 0.487        |              |              | 0.488        |              |              |
| Random Groupings   | <b>0.503</b> | 0.483        | 0.475        | 0.471        | 0.467        | 0.464        | 0.462        | 0.460        | 0.459        |
| Independent        | 0.515        | 0.501        | 0.477        | 0.465        |              |              | 0.454        |              | 0.448        |
| Ours (ESA) 5.3.1   | <b>0.503</b> | 0.487        | 0.467        | 0.461        | 0.457        | 0.451        | 0.451        | 0.447        | 0.447        |
| Ours (HOA) 5.3.2   | <b>0.503</b> | <b>0.461</b> | 0.455        | 0.451        | 0.449        | 0.445        | 0.444        | 0.445        | 0.442        |
| Ours Optimal       | <b>0.503</b> | <b>0.461</b> | <b>0.452</b> | <b>0.446</b> | <b>0.442</b> | <b>0.439</b> | <b>0.436</b> | <b>0.436</b> | <b>0.435</b> |

Table 2. Setting 1: The total test set loss on all five tasks for each method under each inference time budget. Lower is better. The data is the same as in Figures 2 and 3.

|       | SemSeg  | Depth  | Normals | Keypoints | Edges   |
|-------|---------|--------|---------|-----------|---------|
| S     | 0.08039 | -      | -       | -         | -       |
| D     | -       | 0.1695 | -       | -         | -       |
| N     | -       | -      | 0.08591 | -         | -       |
| K     | -       | -      | -       | 0.0895    | -       |
| E     | -       | -      | -       | -         | 0.02783 |
| SD    | 0.07858 | 0.1833 | -       | -         | -       |
| SN    | 0.074   | -      | 0.0997  | -         | -       |
| SK    | 0.07722 | -      | -       | 0.09718   | -       |
| SE    | 0.07897 | -      | -       | -         | 0.04462 |
| DN    | -       | 0.1695 | 0.09275 | -         | -       |
| DK    | -       | 0.1706 | -       | 0.09318   | -       |
| DE    | -       | 0.1748 | -       | -         | 0.03192 |
| NK    | -       | -      | 0.08968 | 0.09181   | -       |
| NE    | -       | -      | 0.09358 | -         | 0.02908 |
| KE    | -       | -      | -       | 0.09185   | 0.03488 |
| SDN   | 0.07498 | 0.1698 | 0.09575 | -         | -       |
| SDK   | 0.07699 | 0.1782 | -       | 0.09704   | -       |
| SDE   | 0.07893 | 0.1863 | -       | -         | 0.04559 |
| SNK   | 0.0722  | -      | 0.09919 | 0.0961    | -       |
| SNE   | 0.07222 | -      | 0.0982  | -         | 0.03689 |
| SKE   | 0.0766  | -      | -       | 0.09342   | 0.03508 |
| DNK   | -       | 0.1654 | 0.09358 | 0.09253   | -       |
| DNE   | -       | 0.1708 | 0.09396 | -         | 0.03286 |
| DKE   | -       | 0.1793 | -       | 0.09073   | 0.02937 |
| NKE   | -       | -      | 0.09626 | 0.09024   | 0.02609 |
| SDNK  | 0.07762 | 0.1822 | 0.09869 | 0.1015    | -       |
| SDNE  | 0.07576 | 0.1735 | 0.09718 | -         | 0.04513 |
| SDKE  | 0.0795  | 0.1797 | -       | 0.09272   | 0.04141 |
| SNKE  | 0.07369 | -      | 0.09944 | 0.09697   | 0.03312 |
| DNKE  | -       | 0.1708 | 0.09392 | 0.09334   | 0.02803 |
| SDNKE | 0.07854 | 0.1864 | 0.1     | 0.09814   | 0.04453 |

Table 3. **Setting 1: The validation set performance of our 31 networks on each task that they solve.** Tasks are named to contain a letter for each task that they solve. *S*: Semantic Segmentation, *D*: Depth Estimation, *N*: Surface Normal Prediction, *K*: Keypoint Detection, *E*: Edge Detection.

|       | SemSeg  | Depth  | Normals | Keypoints | Edges   |
|-------|---------|--------|---------|-----------|---------|
| S     | 0.07662 | -      | -       | -         | -       |
| D     | -       | 0.1696 | -       | -         | -       |
| N     | -       | -      | 0.08555 | -         | -       |
| K     | -       | -      | -       | 0.08847   | -       |
| E     | -       | -      | -       | -         | 0.0275  |
| SD    | 0.07419 | 0.1831 | -       | -         | -       |
| SN    | 0.07084 | -      | 0.0994  | -         | -       |
| SK    | 0.07369 | -      | -       | 0.09601   | -       |
| SE    | 0.07504 | -      | -       | -         | 0.044   |
| DN    | -       | 0.1694 | 0.09249 | -         | -       |
| DK    | -       | 0.1713 | -       | 0.08882   | -       |
| DE    | -       | 0.1753 | -       | -         | 0.03145 |
| NK    | -       | -      | 0.08934 | 0.09077   | -       |
| NE    | -       | -      | 0.09327 | -         | 0.02865 |
| KE    | -       | -      | -       | 0.09077   | 0.0344  |
| SDN   | 0.07193 | 0.17   | 0.09544 | -         | -       |
| SDK   | 0.07311 | 0.1785 | -       | 0.09591   | -       |
| SDE   | 0.07617 | 0.1865 | -       | -         | 0.04474 |
| SNK   | 0.06933 | -      | 0.09966 | 0.09302   | -       |
| SNE   | 0.06859 | -      | 0.09796 | -         | 0.03625 |
| SKE   | 0.07323 | -      | -       | 0.09232   | 0.03463 |
| DNK   | -       | 0.1658 | 0.09318 | 0.09143   | -       |
| DNE   | -       | 0.1706 | 0.09362 | -         | 0.03239 |
| DKE   | -       | 0.1795 | -       | 0.08968   | 0.02887 |
| NKE   | -       | -      | 0.09596 | 0.08921   | 0.02566 |
| SDNK  | 0.07338 | 0.1826 | 0.09836 | 0.1003    | -       |
| SDNE  | 0.07249 | 0.1739 | 0.09689 | -         | 0.04441 |
| SDKE  | 0.07634 | 0.1801 | -       | 0.09157   | 0.04097 |
| SNKE  | 0.07111 | -      | 0.09941 | 0.09464   | 0.03328 |
| DNKE  | -       | 0.1704 | 0.09356 | 0.09226   | 0.02768 |
| SDNKE | 0.07603 | 0.186  | 0.09976 | 0.09704   | 0.04395 |

Table 4. Setting 1: The test set performance of our 31 networks on each task that they solve.
